# Supplementary material for: Preclinical In Vitro Model to Assess the Changes in Permeability and Cytotoxicity of Polarized Intestinal Epithelial Cells during Exposure Mimicking Oral or Intravenous Routes: An Example of Arsenite Exposure
Source: MDPI journal article supplement (doi:10.3390/ijms23094851), 2022-04-27
Supplement: s1 [file s1]

## Supplemental Material

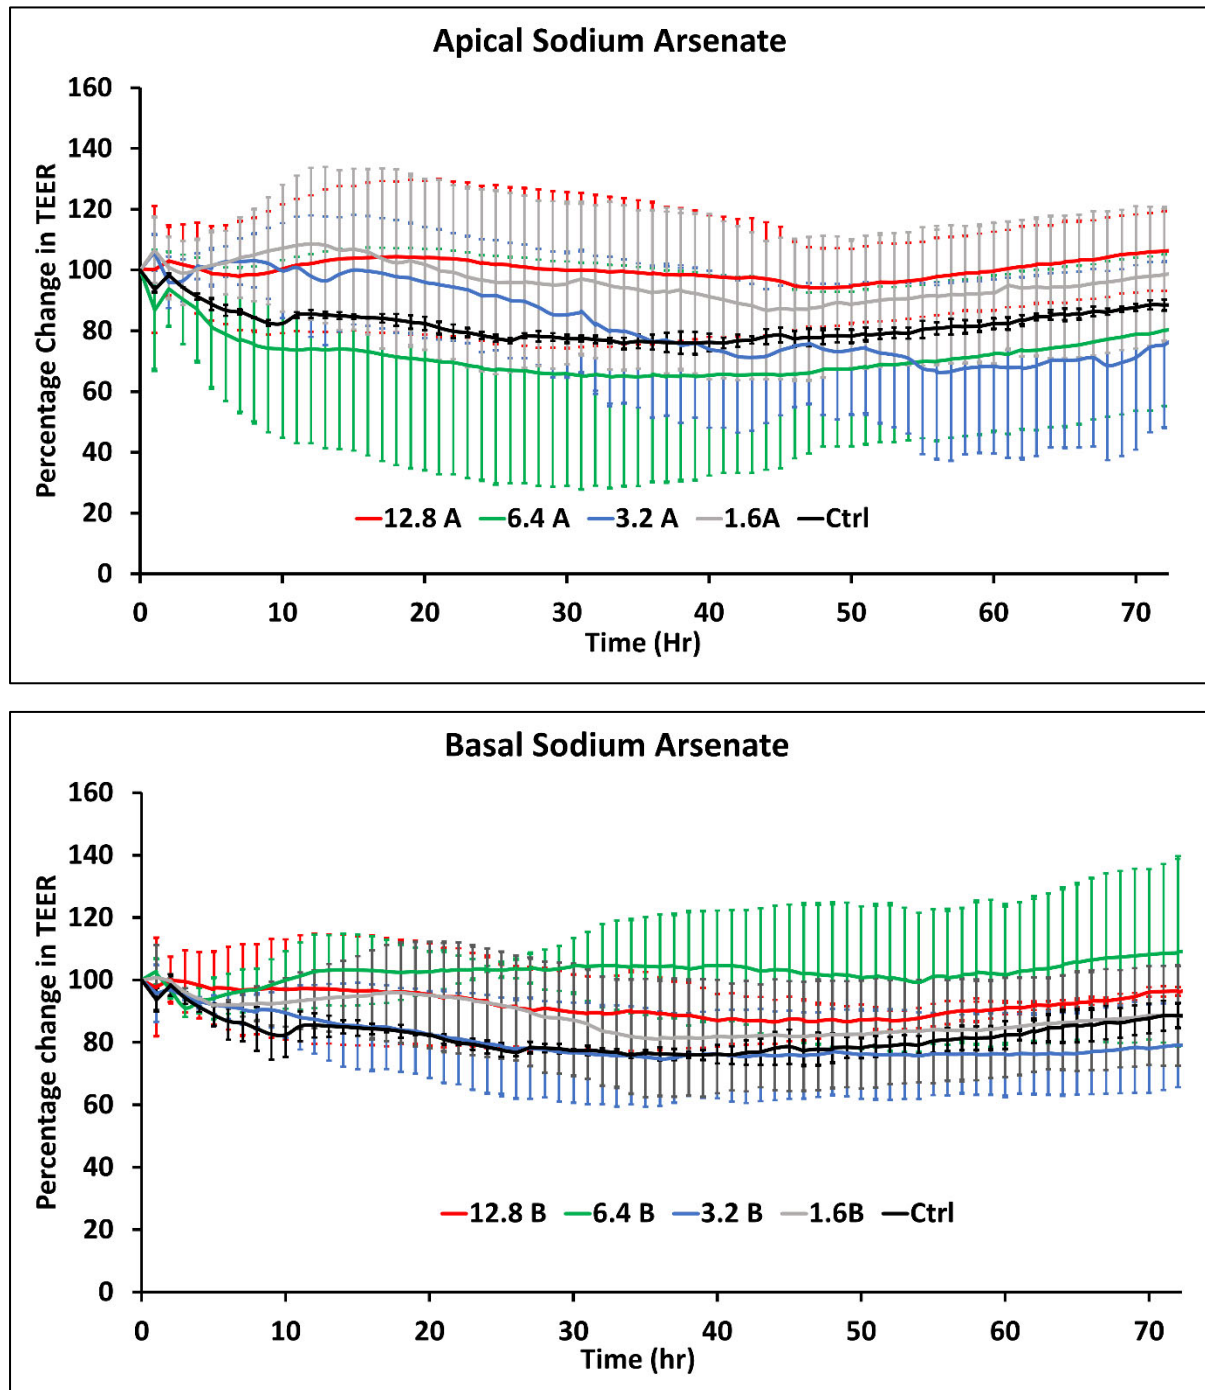

**Supplemental Figure S1a (top) and S1b (bottom):** Change in TEER of T-84 cells monolayers during the exposure of sodium arsenate from the apical side (Top panel; 1a). Change in TEER of T-84 cells monolayers during the exposure of sodium arsenate from the basolateral side (Top panel; 1b)

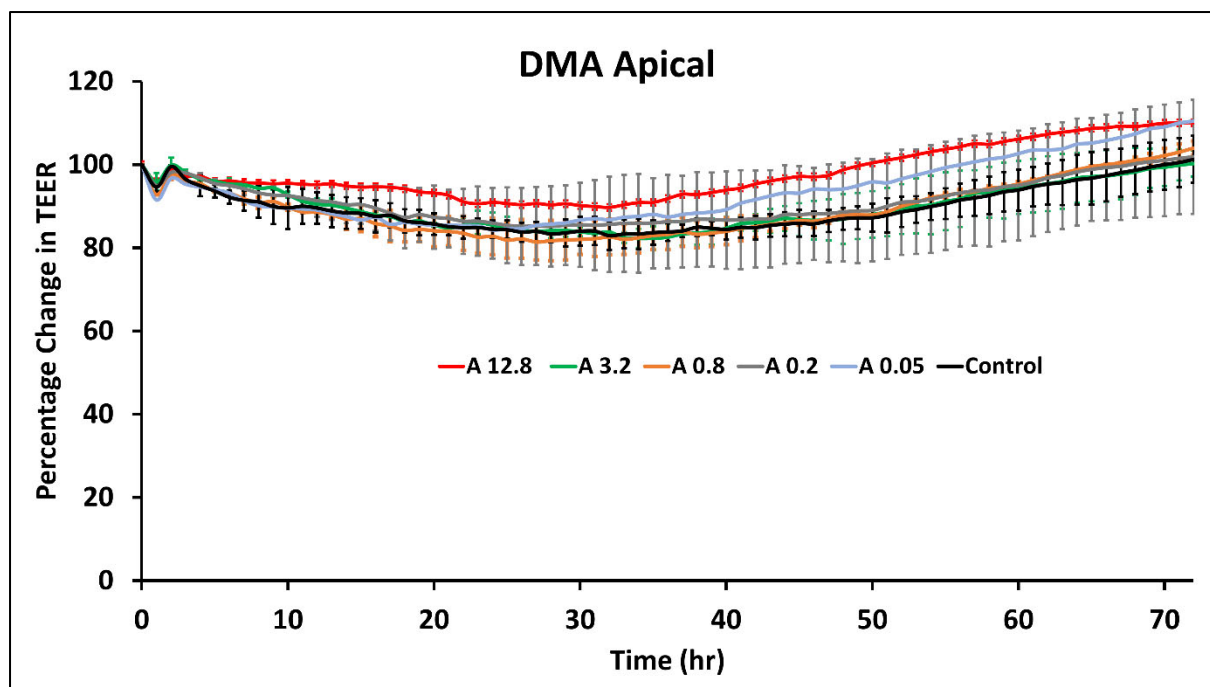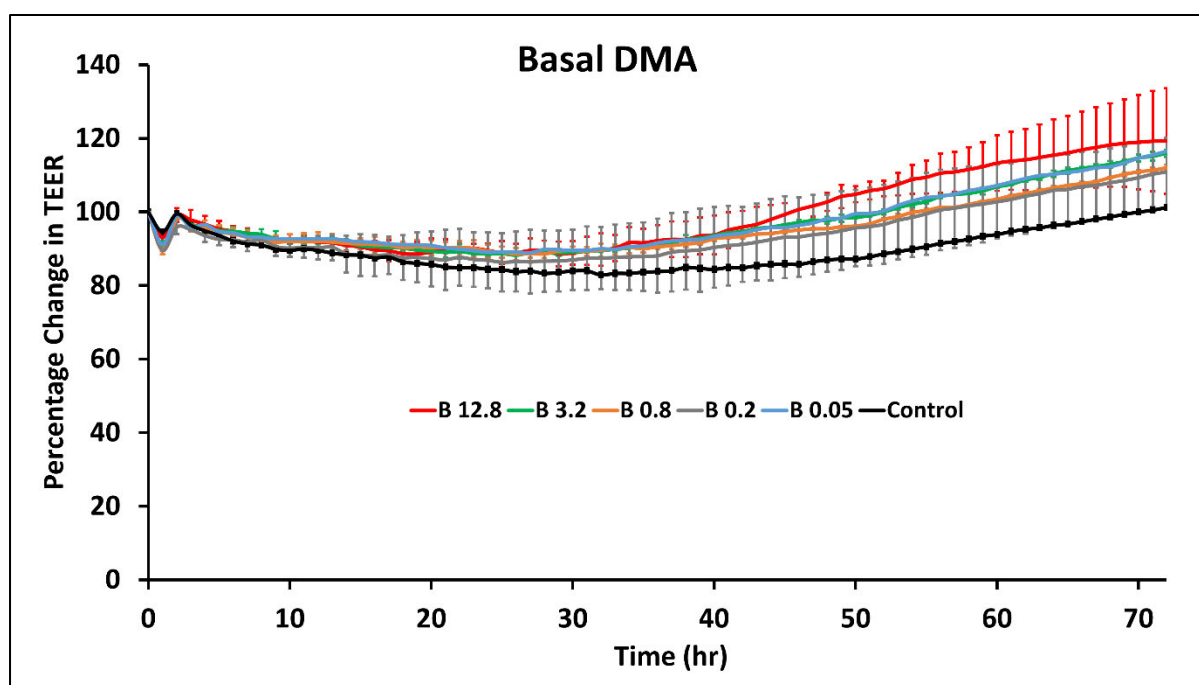

**Supplemental Figure S2a (top) and S2b (bottom):** Change in TEER of T-84 cells monolayers during the exposure to DMA from the apical side (Top panel; 2a). Change in TEER of T-84 cells monolayers during exposure of the DMA from the basolateral side (Lower panel; 2b)

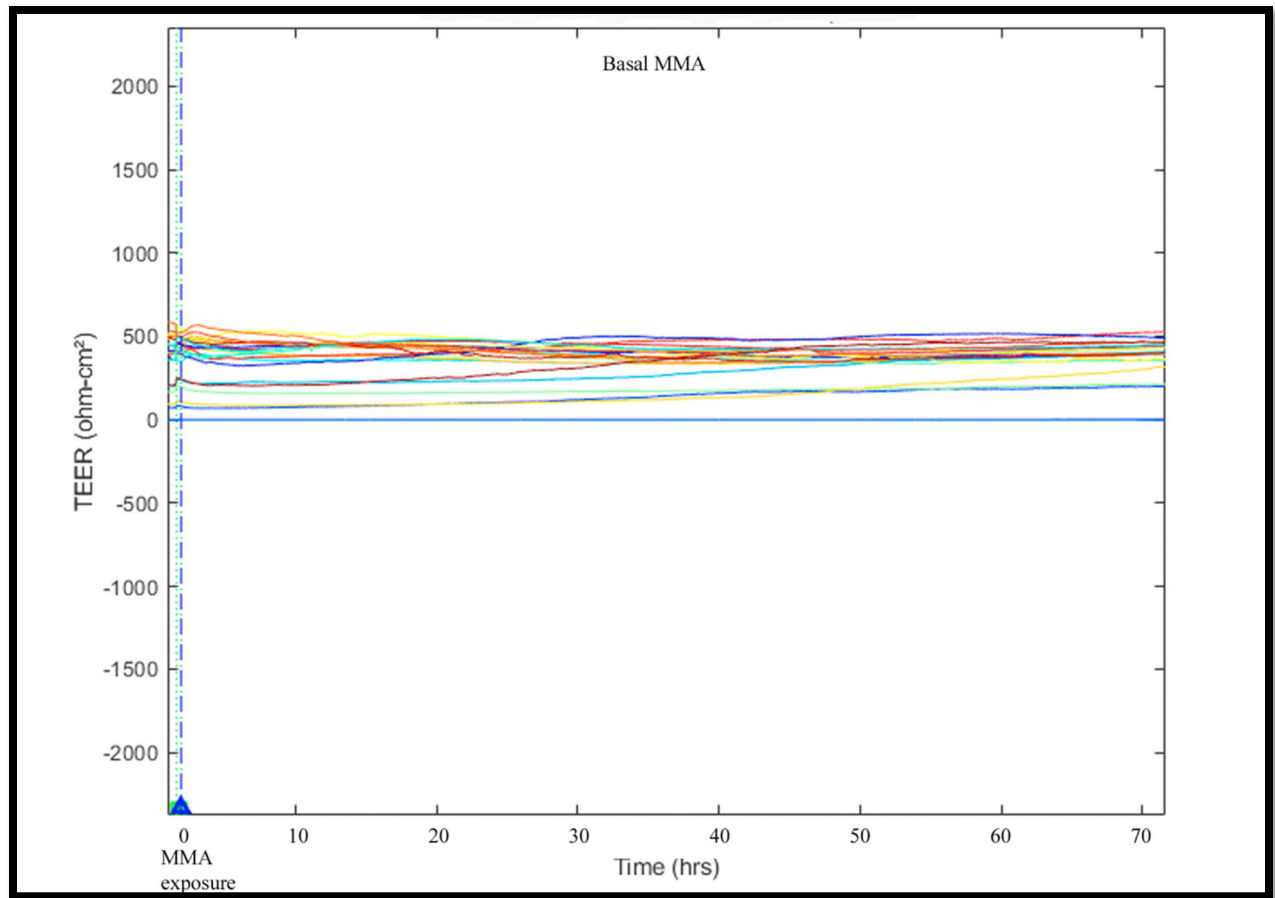

**Supplemental Figure S3:** MMA exposure from the basolateral side did not show any changes in the TEER of T-84 cells monolayers

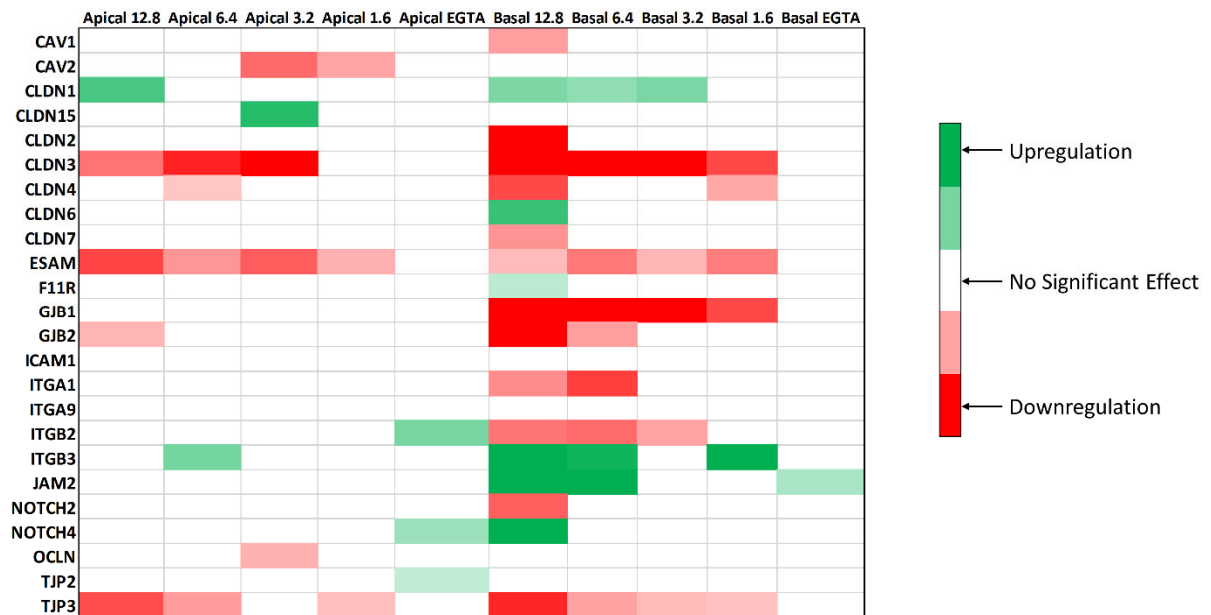

**Supplemental Figure S4:** Heatmap of the fold regulation of permeability related genes in T-84 cells after exposure to different concentration of sodium arsenite from apical or basolateral compartment. Green color represents the upregulation, red color represents downregulation.
